# Supplementary material for: Artificial intelligence and radiomics: fundamentals, applications, and challenges in immunotherapy
Source: PubMed Central journal article supplement — J Immunother Cancer. 2022 Sep 30;10(9):e005292. doi: 10.1136/jitc-2022-005292 (PMC9528623; doi:10.1136/jitc-2022-005292), 2022-09-30
Supplement: jitc-2022-005292supp001.pdf [file jitc-2022-005292supp001.pdf]

## Supporting Information

*Artificial Intelligence and Radiomics – Fundamentals, Applications, and Challenges in Immunotherapy*

Laurent Dercle<sup>1\*</sup>, Jeremy McGale<sup>1\*</sup>, Shawn Sun<sup>1</sup>, Aurelien Marabelle<sup>2</sup>, Randy Yeh<sup>3</sup>, Eric Deutsch<sup>4</sup>, Fatima-Zohra Mokrane<sup>5</sup>, Michael Farwell<sup>6</sup>, Samy Ammari<sup>4,7</sup>, Heiko Schöder<sup>8</sup>, Binsheng Zhao<sup>1</sup>, Lawrence H. Schwartz<sup>1</sup>

\*These authors contributed equally

### Emails:

[laurent.dercle@gmail.com](mailto:laurent.dercle@gmail.com), [jm4782@cumc.columbia.edu](mailto:jm4782@cumc.columbia.edu), [shawnsun25@gmail.com](mailto:shawnsun25@gmail.com),  
[aurelien.marabelle@gustaveroussy.fr](mailto:aurelien.marabelle@gustaveroussy.fr), [yehr@mskcc.org](mailto:yehr@mskcc.org), [eric.deutsch@gustaveroussy.fr](mailto:eric.deutsch@gustaveroussy.fr), [mokrane.fz@chu-toulouse.fr](mailto:mokrane.fz@chu-toulouse.fr), [Michael.Farwell@pennmedicine.upenn.edu](mailto:Michael.Farwell@pennmedicine.upenn.edu), [samy.ammari@gustaveroussy.fr](mailto:samy.ammari@gustaveroussy.fr), [schoderh@mskcc.org](mailto:schoderh@mskcc.org),  
[bz2166@cumc.columbia.edu](mailto:bz2166@cumc.columbia.edu), [lhs2120@cumc.columbia.edu](mailto:lhs2120@cumc.columbia.edu)

### Affiliations

1. Department of Radiology, New York-Presbyterian Hospital, Columbia University College of Physicians and Surgeons, New York, New York, United States of America
2. Department of Therapeutic Innovation and Early Trials, INSERM U1015 & CIC 1428, Université Paris Saclay, Gustave Roussy, Villejuif, France
3. Molecular Imaging and Therapy Service, Department of Radiology, Memorial Sloan Kettering Cancer Center, New York, NY, United States of America.
4. Department of Radiation Oncology, Gustave Roussy Cancer Campus, Biomaps, INSERM 1030, Université Paris-Saclay, Villejuif, F-94805, France
5. Radiology Department, Rangueil University Hospital, 1 avenue du Professeur Jean, Poulhes, 31059, Toulouse France
6. Division of Nuclear Medicine and Molecular Imaging, Hospital of the University of Pennsylvania, Philadelphia, PA, United States of America
7. ELSAN Department of Radiology, Institut de Cancérologie Paris Nord, Sarcelles, France
8. Molecular Imaging & Therapy Service, Memorial Sloan Kettering Cancer Center, New York, NY, United States of America

**Table of Contents****Table S1** - Metrics for Radiomics Quality Score (RQS) assessment**Figure S2** - Idealized workflow for radiomics model training, validation, and testing**Table S3** - Summary performance metrics delineated by predictive aim and validation strategy

| <b>Radiomics Quality Score</b>                                                                             |                                                                                                           |             |
|------------------------------------------------------------------------------------------------------------|-----------------------------------------------------------------------------------------------------------|-------------|
| Metric                                                                                                     |                                                                                                           | Point Value |
| Image Protocol Quality                                                                                     | Well-documented imaging protocols                                                                         | 1           |
|                                                                                                            | Used public imaging protocols                                                                             | 1           |
| <b>Multiple Segmentation</b>                                                                               |                                                                                                           |             |
| Segmentations by independent radiologists with calculation of an intra-class coefficient or similar metric |                                                                                                           | 1           |
| <b>Phantom Study</b>                                                                                       |                                                                                                           |             |
|                                                                                                            | Performed phantom studies on all scanners used                                                            | 1           |
| <b>Multiple Time Points</b>                                                                                |                                                                                                           |             |
|                                                                                                            | Took images at multiple time points and analyzed feature robustness to temporal variation                 | 1           |
| <b>Feature Reduction</b>                                                                                   |                                                                                                           |             |
|                                                                                                            | Performed feature reduction or made adjustments for multiple testing to reduce possibility of overfitting | 3           |
| <b>Multivariable Analysis</b>                                                                              |                                                                                                           |             |
|                                                                                                            | Performed multivariable analysis with non-radiomics features                                              | 1           |
| <b>Biological Correlate</b>                                                                                |                                                                                                           |             |
|                                                                                                            | Detected and discussed phenotypic implications of radiomic features                                       | 1           |
| <b>Cut-Off Analysis</b>                                                                                    |                                                                                                           |             |
|                                                                                                            | Performed cut-off analyses and determined risk groups                                                     | 1           |
| <b>Discrimination Statistics</b>                                                                           |                                                                                                           |             |
|                                                                                                            | Reported discrimination statistics/ statistical significance                                              | 1           |
|                                                                                                            | Applied a resampling method                                                                               | 1           |
| <b>Calibration Statistics</b>                                                                              |                                                                                                           |             |
|                                                                                                            | Reported calibration statistics/ statistical significance                                                 | 1           |
|                                                                                                            | Applied a resampling method                                                                               | 1           |
| <b>Prospective Study</b>                                                                                   |                                                                                                           |             |
|                                                                                                            | Utilized a prospective cohort                                                                             | 7           |
| <b>Validation</b>                                                                                          |                                                                                                           |             |
|                                                                                                            | Used a validation dataset from the same institute as training                                             | 2           |
|                                                                                                            | Used a validation dataset from another institute                                                          | 3           |
|                                                                                                            | Used validation datasets from two different institutes                                                    | 4           |
|                                                                                                            | Validated a previously published signature                                                                | 4           |
|                                                                                                            | Used datasets from three different institutes                                                             | 5           |
| <b>Gold Standard</b>                                                                                       |                                                                                                           |             |
|                                                                                                            | Compared results to the current gold standard method                                                      | 2           |
| <b>Clinical Utility</b>                                                                                    |                                                                                                           |             |
|                                                                                                            | Performed a decision curve analysis                                                                       | 2           |
| <b>Cost Analysis</b>                                                                                       |                                                                                                           |             |
|                                                                                                            | Performed a cost-effectiveness analysis                                                                   | 1           |
| <b>Open Science and Data</b>                                                                               |                                                                                                           |             |
|                                                                                                            | Used or published open-source scans                                                                       | 1           |
|                                                                                                            | Used or published open-source region of interest segmentations                                            | 1           |
|                                                                                                            | Used or published open-source code                                                                        | 1           |
|                                                                                                            | Used or published open-source radiomic features                                                           | 1           |

**Table S1**

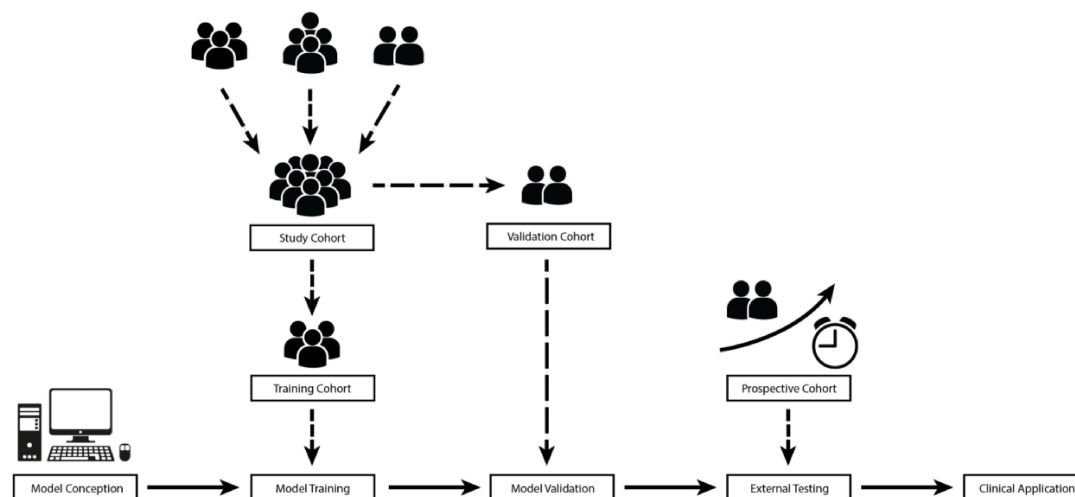

**Figure S2:** An idealized workflow for radiomics model training, validation, and testing. The gold-standard model development strategy should utilize a multi-center patient population, clearly delineate training and validation sets, and test final model performance on an external, prospective cohort.

**Table S3**

|                             | Prognosis |                |              | Treatment Response |                |              | Immune Environment* |                |              | Tumor Phenotype* |                |              |
|-----------------------------|-----------|----------------|--------------|--------------------|----------------|--------------|---------------------|----------------|--------------|------------------|----------------|--------------|
|                             | Test Set  | Validation Set | Training Set | Test Set           | Validation Set | Training Set | Test Set            | Validation Set | Training Set | Test Set         | Validation Set | Training Set |
| <b>Individual</b>           |           |                |              |                    |                |              |                     |                |              |                  |                |              |
| n                           | 4         | 11             | 11           | 5                  | 11             | 4            | 3                   | 5              | 2            | 1                | 9              | 3            |
| mean                        | 0.730     | 0.777          | 0.816        | 0.761              | 0.830          | 0.805        | 0.764               | 0.767          | 0.873        | 0.840            | 0.831          | 0.764        |
| median                      | 0.704     | 0.750          | 0.821        | 0.810              | 0.810          | 0.804        | 0.760               | 0.753          | 0.873        | 0.840            | 0.834          | 0.750        |
| <b>Combined</b>             |           |                |              |                    |                |              |                     |                |              |                  |                |              |
| studies                     |           | 26             |              |                    | 20             |              |                     | 10             |              |                  | 13             |              |
| aggregate pts. <sup>o</sup> |           | 3249           |              |                    | 2377           |              |                     | 1801           |              |                  | 4141           |              |
| mean                        |           | 0.787          |              |                    | 0.808          |              |                     | 0.787          |              |                  | 0.816          |              |
| median                      |           | 0.771          |              |                    | 0.810          |              |                     | 0.760          |              |                  | 0.834          |              |
| IQR                         |           | 0.711 - 0.875  |              |                    | 0.785 - 0.860  |              |                     | 0.727 - 0.848  |              |                  | 0.790 - 0.848  |              |

\* Immune Environment (Examining immune cell (e.g. CD8+, CD4+, CD3, T-helper 1/2, B-cells, Natural Killer Cells, among others) infiltration of primary tumor)  
\* Tumor Phenotype (Tumor PD-L1 expression or microsatellite instability)  
<sup>o</sup> Aggregate patients from all studies reporting performance of a radiomics model in each category
